# Supplementary material for: In situ growth of MnO2 nanoparticles on supramolecular polyaniline as chiral nanozymes for effective enantioselective catalysis
Source: Royal Society of Chemistry journal article supplement (doi:10.1039/d4cc05482b), 2024-01-01
Supplement: d4cc05482b1.pdf [file d4cc05482b1.pdf]

Supporting Information

*for*

**In-situ Growth of MnO<sub>2</sub> Nanoparticles on Supramolecular  
Polyaniline as Chiral Nanozymes for Effective Enantioselective  
Catalysis**

Chu Wang, Zheng Xi,\* Xiaohuan Sun, Jie Han\* and Rong Guo

*School of Chemistry and Chemical Engineering, Yangzhou University, Yangzhou 225002,  
Jiangsu, P. R. China*

*\*Corresponding author*

E-mails: xizheng@yzu.edu.cn (Z. X.); hanjie@yzu.edu.cn (J. H.)

## 1. Materials and characterization

**Materials:** Aniline monomer (Shanghai Chemical Co.) was distilled under reduced pressure before use. N-Phenyl-p-phenylenediamine, (1*R*)-(-)-Camphor-10-sulfonic acid (*R*-CSA), (1*S*)-(+)-Camphor-10-sulfonic acid (*S*-CSA), 3,4-dihydroxy-L-phenylalanine (*S*-DOPA), 3,4-dihydroxy-D-phenylalanine (*R*-DOPA) were purchased from Sigma-Aldrich. The H<sub>2</sub>O<sub>2</sub>, Potassium permanganate (KMnO<sub>4</sub>), ammonium persulfate and ammonia were purchased from Sinopharm Chemical Reagent Co., Ltd. (Shanghai, China). MnO<sub>2</sub> nanoparticles were purchased from Borfos Nanotechnology Co., Ltd (Ningbo). All the above reagents were of analytical grade, and used without further purification. The water used in this study was deionized by milli-Q Plus system (Millipore, France), with the electrical resistivity of 18.2 MΩ.

**Instruments and characterization:** Morphologies of the as prepared nanomaterials were characterized with field emission scanning electron microscope (FESEM, 300, ZEISS), transmission electron microscope (TEM, HT7800) and high-resolution TEM (HRTEM, Tecnai G2 F30 S-Twin TEM, FEI). The UV-Vis absorption spectra were recorded using UV-2550 UV/Visible spectrophotometer (JASCO International Co., Ltd.). The CD analysis was performed on a JascoJ-810 CD spectropolarimeter (JASCO International Co., Ltd.) with a resolution of 1 nm. The phase composition was measured using an Axis Ultra X-ray photoelectron spectroscopy (XPS, Kratos Analytical Ltd.) equipped with a standard monochromatic Al K $\alpha$  source ( $h\nu = 1486.6$  eV).

**2. Synthesis of *P/M*-PANI:** The *P/M*-PANI-*S/R*-CSA was prepared according to the previous publication. Specifically, 0.2 g (2.1 mmol) of aniline, 3.235 g of *S/R*-CSA (13.9 mmol), and 0.063 mmol of oligomer were dissolved in 1.5 mL of water. Subsequently, the aqueous solution of ammonium persulfate (2.1 mmol) was added incrementally in five separate portions to the mixture of aniline and CSA. After each addition, the mixed solution was stirring vigorously for 30 s. The reaction mixture was left standing for 20 h at room temperature following by 3 times wash with water. Then the *P/M*-PANI-*S/R*-CSA were dispersed into 150 mL of 0.1 M  $\text{NH}_3 \cdot \text{H}_2\text{O}$ , stirring at room temperature for 4 h to obtain *P/M*-PANI for further use.

**3. Synthesis of *P/M*-P@M(x):** In a typical synthesis,  $\text{KMnO}_4$  aqueous solution (0.02 mol  $\text{L}^{-1}$ ) was mixed with aqueous solution containing *P/M*-PANI nanofibers (2.0 g  $\text{L}^{-1}$ ). The total volume of the reaction system was maintained at 20 mL, the concentration of *P/M*-PANI nanofibers was set at 0.4 g  $\text{L}^{-1}$ , and the concentration of  $\text{KMnO}_4$  ranged from 5 to 80 mmol  $\text{L}^{-1}$ . Then the reaction system was maintained under magnetic stirring at room temperature for 1.5 h. Finally, the products were washed with deionized water for 3 times and dispersed in 4 mL deionized water for further use.

**4. Synthesis of *P/M*-P+M(45):** In a typical synthesis, 8 mg of *P*-PANI or *M*-PANI were dispersed into 10 mL deionized water, respectively, and 10 mL of 1 M thioglycolic acid (TA) solution was added to the solution of *P*-PANI or *M*-PANI. After stirring for 4 h at room temperature, the *P*-PANI-TA and *M*-PANI-TA were collected by centrifugation

after washing three times with deionized water. Following, 16 mL MnO<sub>2</sub> NPs aqueous solution was mixed with 4 mL aqueous solution containing *P*-PANI-TA or *M*-PANI-TA nanofibers under stirring. Finally, the products were washed with deionized water for 3 times and dispersed in 4 mL deionized water for further use.

**5. Kinetic measurements:** Kinetic measurements were carried out in time course mode by monitoring the absorbance changes of reaction mixture at 475 nm. Experiments were carried out using 150  $\mu$ L *P/M*-P@M(*x*) solution in a reaction volume of 3 mL buffer solution (25 mM Na<sub>2</sub>HPO<sub>4</sub>, pH 7.0, 37 °C) with DOPA as substrate, and the concentration of H<sub>2</sub>O<sub>2</sub> was kept at 50 mM. The oxidation rates of *R/S*-DOPA in the presence of chiral nanozymes were analyzed according to the Michaelis-Menten model:  $v = V_{\max}C/(K_M+C)$ , where  $v$  is the initial velocity,  $V_{\max}$  is the maximal reaction velocity,  $K_M$  is the affinity constant, and  $C$  is the concentration of substrate. The  $v$  at the determined concentration is calculated according to Lambert Beer's law:  $v = A \cdot \varepsilon^{-1} \cdot L^{-1} \cdot t^{-1}$ , where  $A$  is the absorbance changes at  $\lambda_{\max} = 475$  nm ( $\varepsilon = 4770$  M<sup>-1</sup>·cm<sup>-1</sup>) of the dopachrome products for *R/S*-DOPA,  $L$  is the optical length of the cuvette, and  $t$  is the time corresponding to the absorbance changes.  $k_{\text{cat}}$  was calculated according to the equation:  $k_{\text{cat}} = V_{\max}/S$ , where  $S$  is the mass of the chiral nanozyme used in the reaction system. Select factor of various nanocatalysts for *R/S*-DOPA was defined as  $[k_{\text{cat}}/K_M]_{S\text{-DOPA}}/[k_{\text{cat}}/K_M]_{R\text{-DOPA}}$  or  $[k_{\text{cat}}/K_M]_{R\text{-DOPA}}/[k_{\text{cat}}/K_M]_{S\text{-DOPA}}$ , respectively.

**6. Measurement of activation energy:** The activation energies ( $E_a$ ) for the DOPA

catalytic reaction taking advantage of  $P/M-P@M(x)$  was calculated according to Arrhenius equation:

$$\ln v = \ln A - E_a/RT \quad (\text{Eq. S1})$$

where  $A$ , is constant, is the frequency factor,  $R$  is the gas constant and  $T$  is the absolute temperature (K). When measuring the  $E_a$ , the concentration of  $H_2O_2$  and DOPA were kept at 50 mM and 0.05 mM, respectively.

**7. Enantioselective separation of DOPA:** 20.0 mg of  $P/M-P@M(x)$  was mixed with 5 mL of racemic DOPA aqueous solution (0.05 mM). The suspension was stirred for 4 h. After that, the suspension was filtered, and the filtrate was diluted and monitored by CD and UV.

**8. Statistical analysis:** The experimental results were expressed as mean  $\pm$  SD.

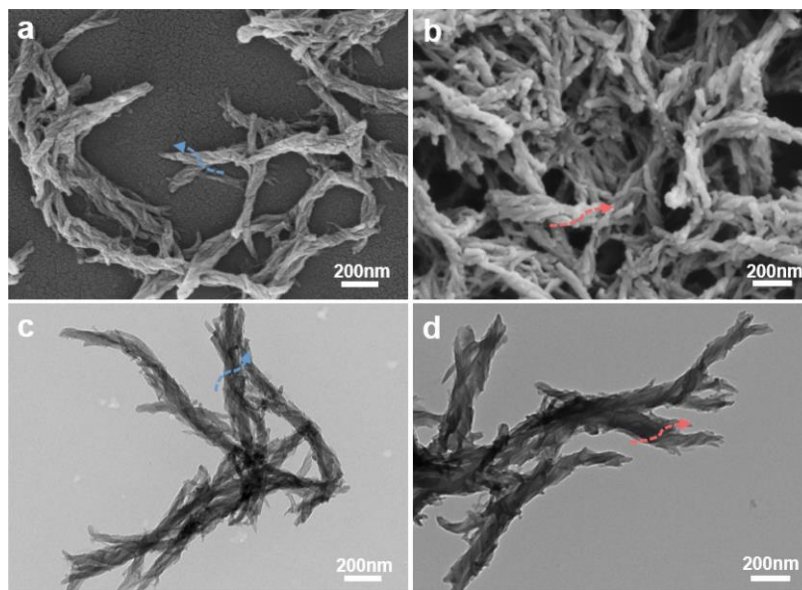

**Fig. S1** SEM images of a) *P*-PANI and b) *M*-PANI, TEM images of c) *P*-PANI and d) *M*-PANI.

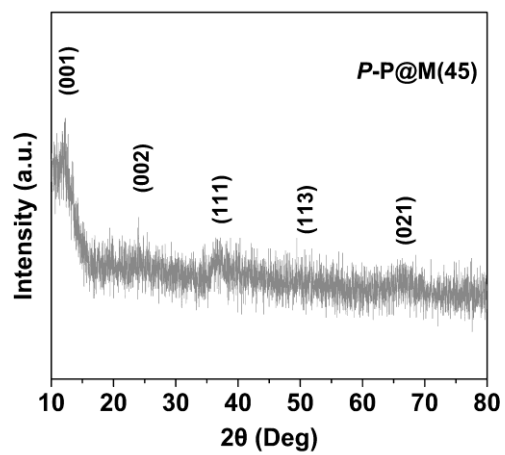

**Fig. S2** XRD pattern of *P-P@M(45)*.

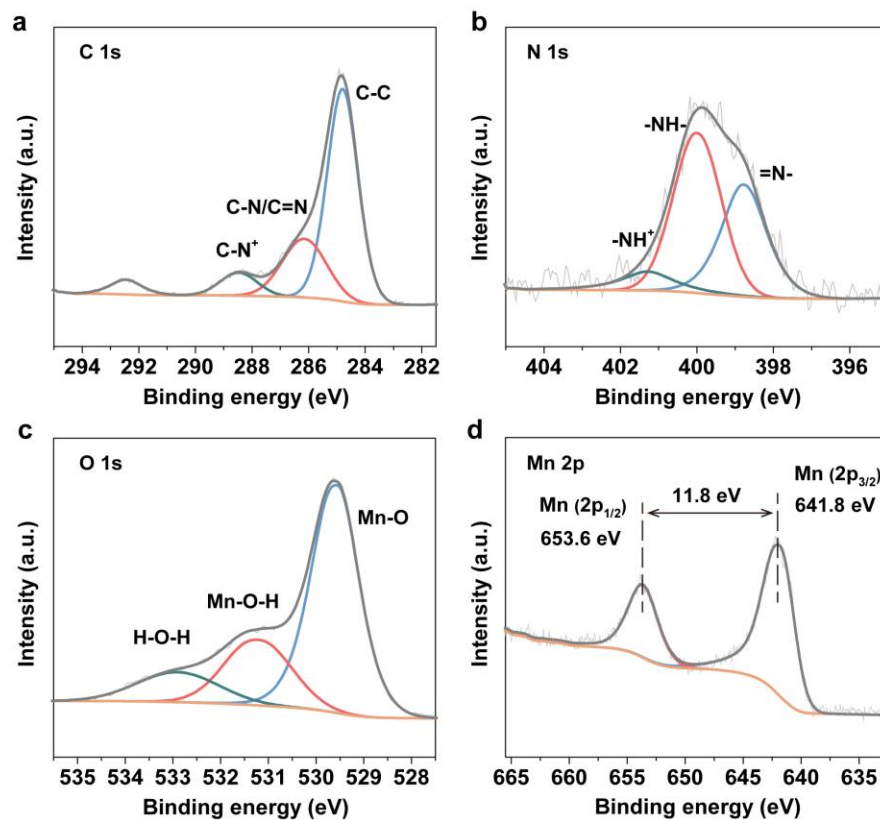

**Fig. S3** XPS spectroscopy analysis of a) C 1s, b) N 1s, c) O 1s and d) Mn 2p for *P-P@M(45)*.



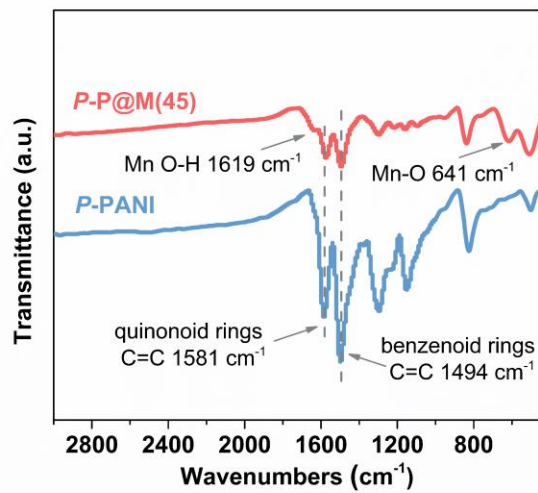

**Fig. S4** FTIR spectra of *P-PANI* and *P-P@M(45)*.

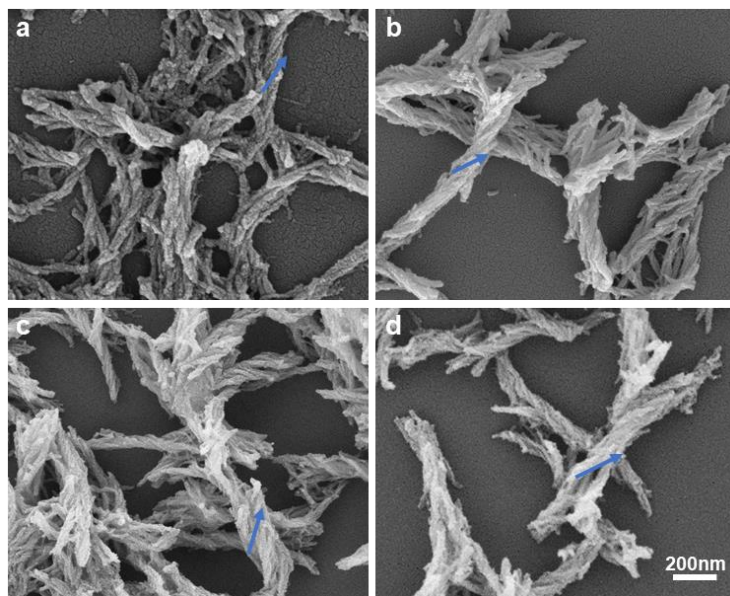

**Fig. S5** SEM images of a)  $P-P@M(12)$ , b)  $P-P@M(20)$ , c)  $P-P@M(33)$  and d)  $P-P@M(45)$ .

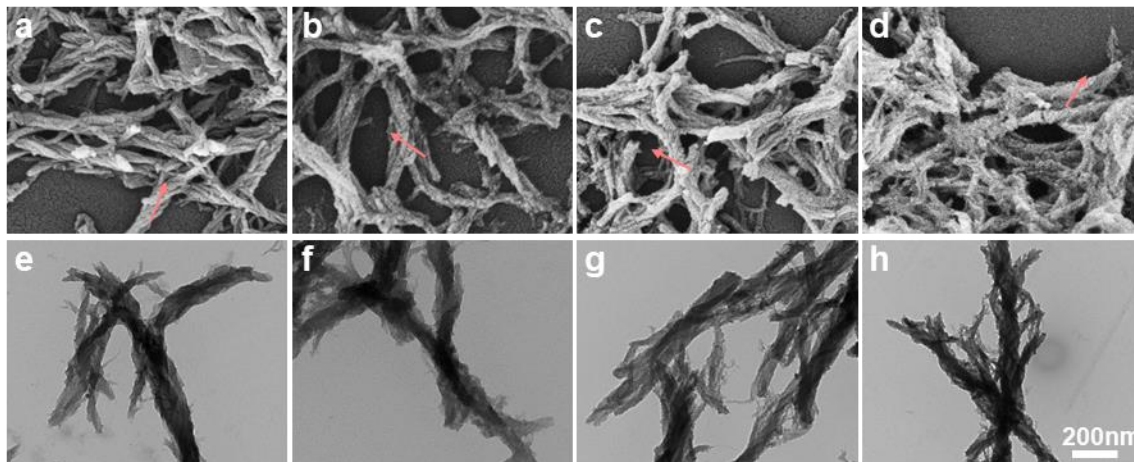

**Fig. S6** SEM images of a)  $M\text{-P@M}(12)$ , b)  $M\text{-P@M}(20)$ , c)  $M\text{-P@M}(33)$  and d)  $M\text{-P@M}(45)$ . TEM images of e)  $M\text{-P@M}(12)$ , f)  $M\text{-P@M}(20)$ , g)  $M\text{-P@M}(33)$  and h)  $M\text{-P@M}(45)$ .

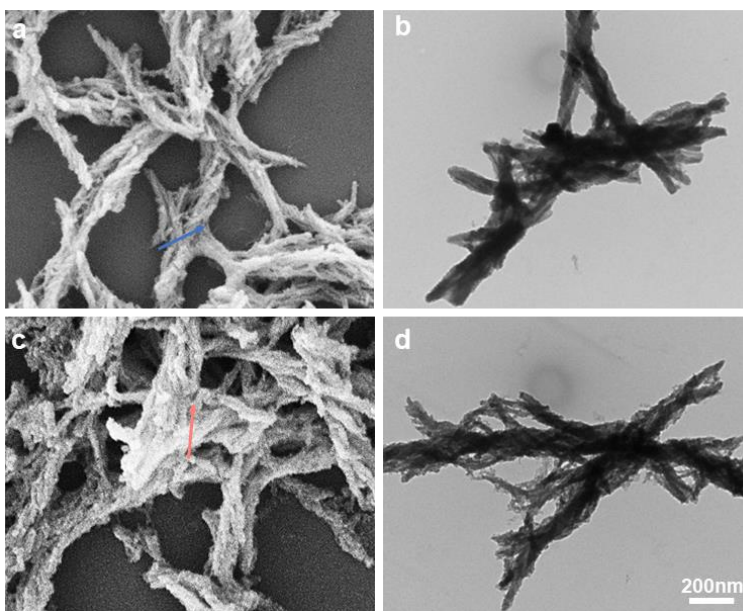

**Fig. S7** a) SEM and b) TEM images of *P-P@M(48)*. c) SEM and d) TEM images of *M-P@M(48)*.

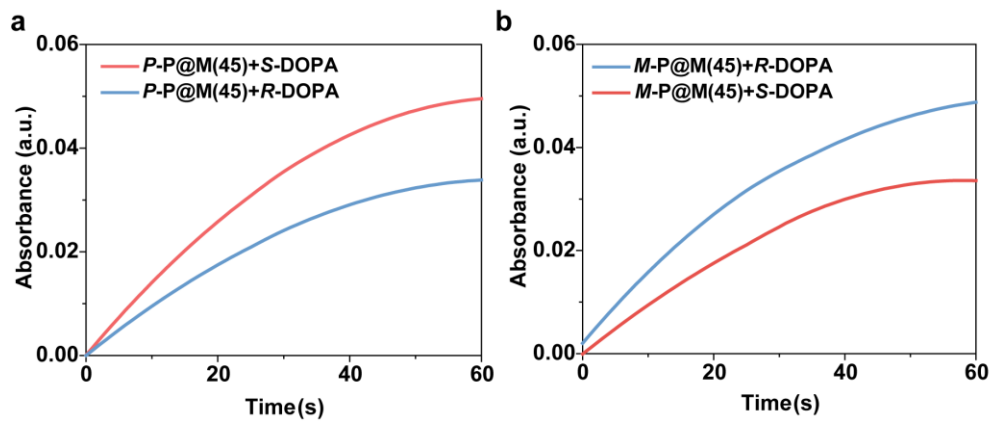

**Fig. S8** Kinetic curves of “Absorption vs. Time” for a) *P-P@M(45)* and b) *M-P@M(45)* obtained with *S/R*-DOPA concentration fixed as 0.05 mM at  $\lambda_{\text{max}} = 475$  nm.

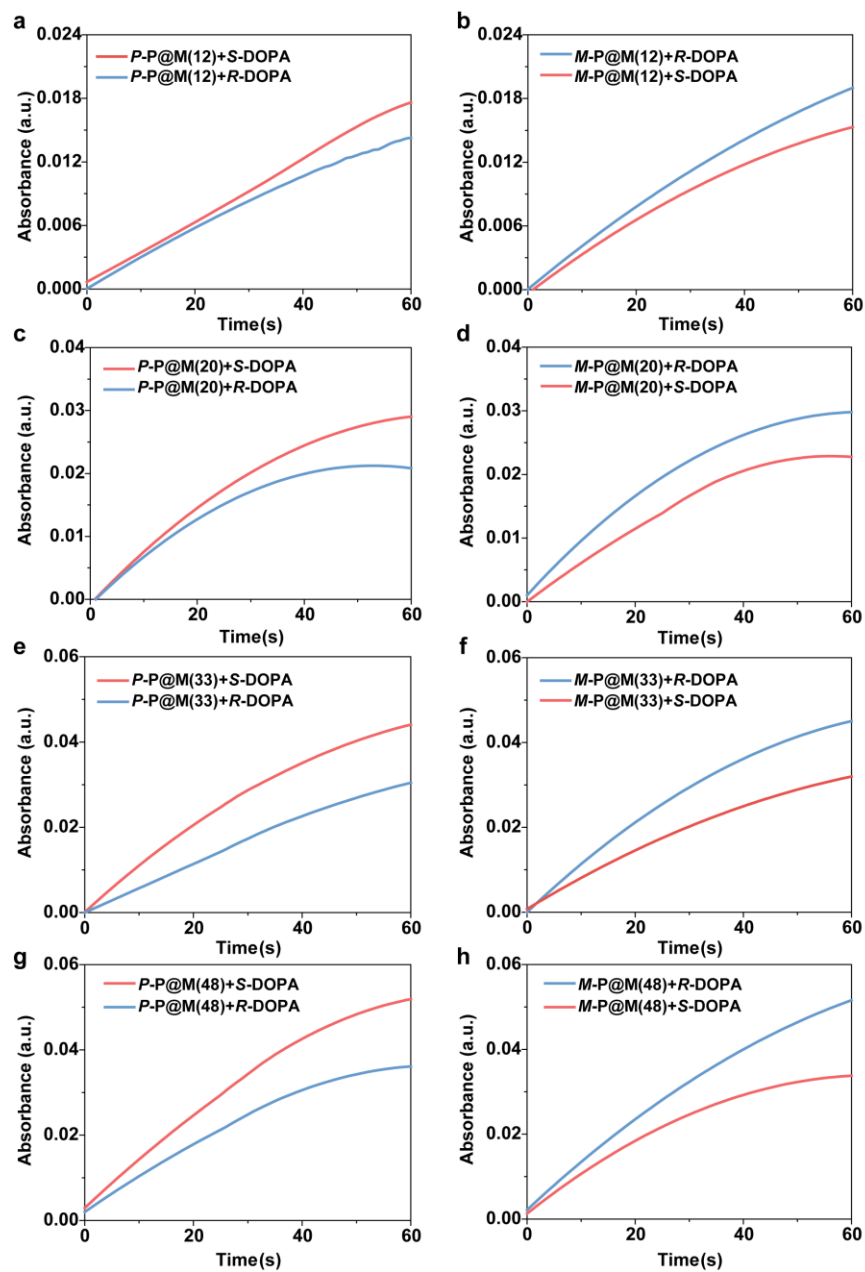

**Fig. S9** Kinetic curves of “Absorption vs. Time” for a)  $P-P@M(12)$ , b)  $M-P@M(12)$ , c)  $P-P@M(20)$ , d)  $M-P@M(20)$ , e)  $P-P@M(33)$ , f)  $M-P@M(33)$ , g)  $P-P@M(48)$  and h)  $M-P@M(48)$  obtained with  $S/R$ -DOPA concentration fixed as 0.05 mM at  $\lambda_{\max} = 475$  nm.

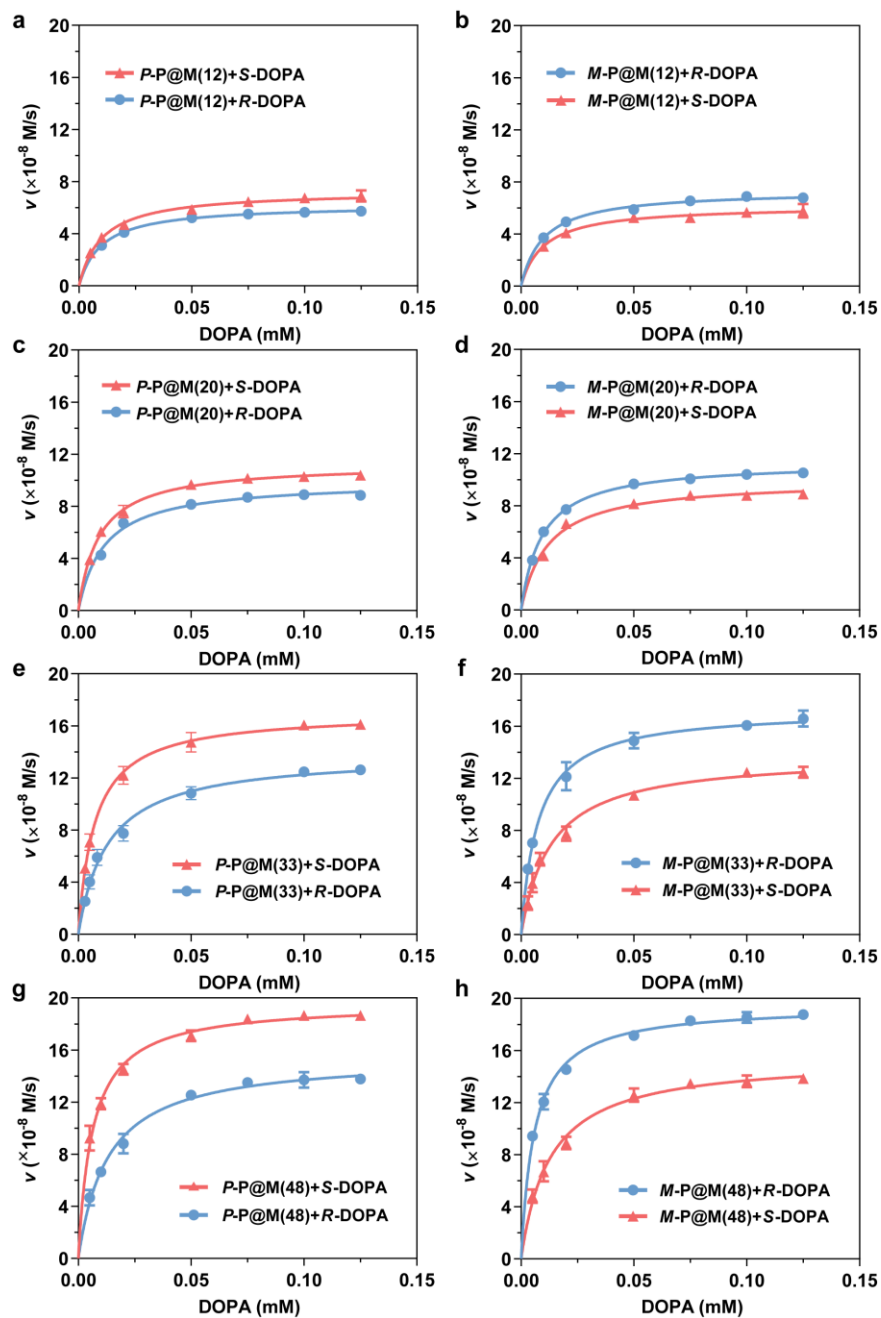

**Fig. S10** Michaelis-Menten curves for the oxidation of *S/R*-DOPA catalysed by a) *P-P@M(12)*, b) *M-P@M(12)*, c) *P-P@M(20)*, d) *M-P@M(20)*, e) *P-P@M(33)*, f) *M-P@M(33)*, g) *P-P@M(48)* and h) *M-P@M(48)*.

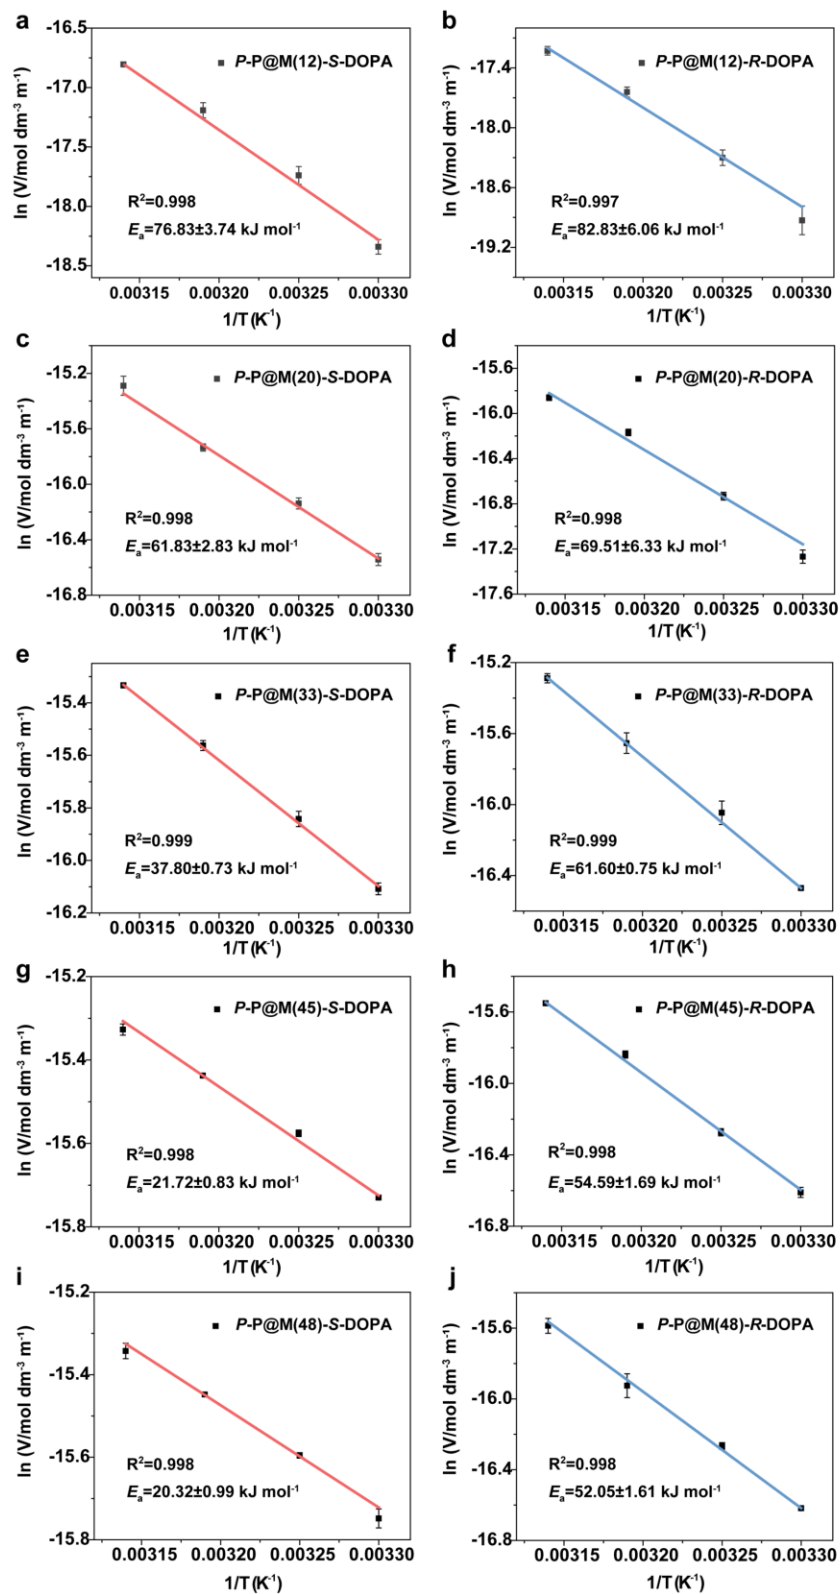

**Fig. S11** Activation energy ( $E_a$ ) lines for a, b)  $P\text{-P@M}(12)$ , c, d)  $P\text{-P@M}(20)$ , e, f)  $P\text{-P@M}(33)$  g, h)  $P\text{-P@M}(45)$  and i, j)  $P\text{-P@M}(48)$  for catalyzing  $S/R$ -DOPA.



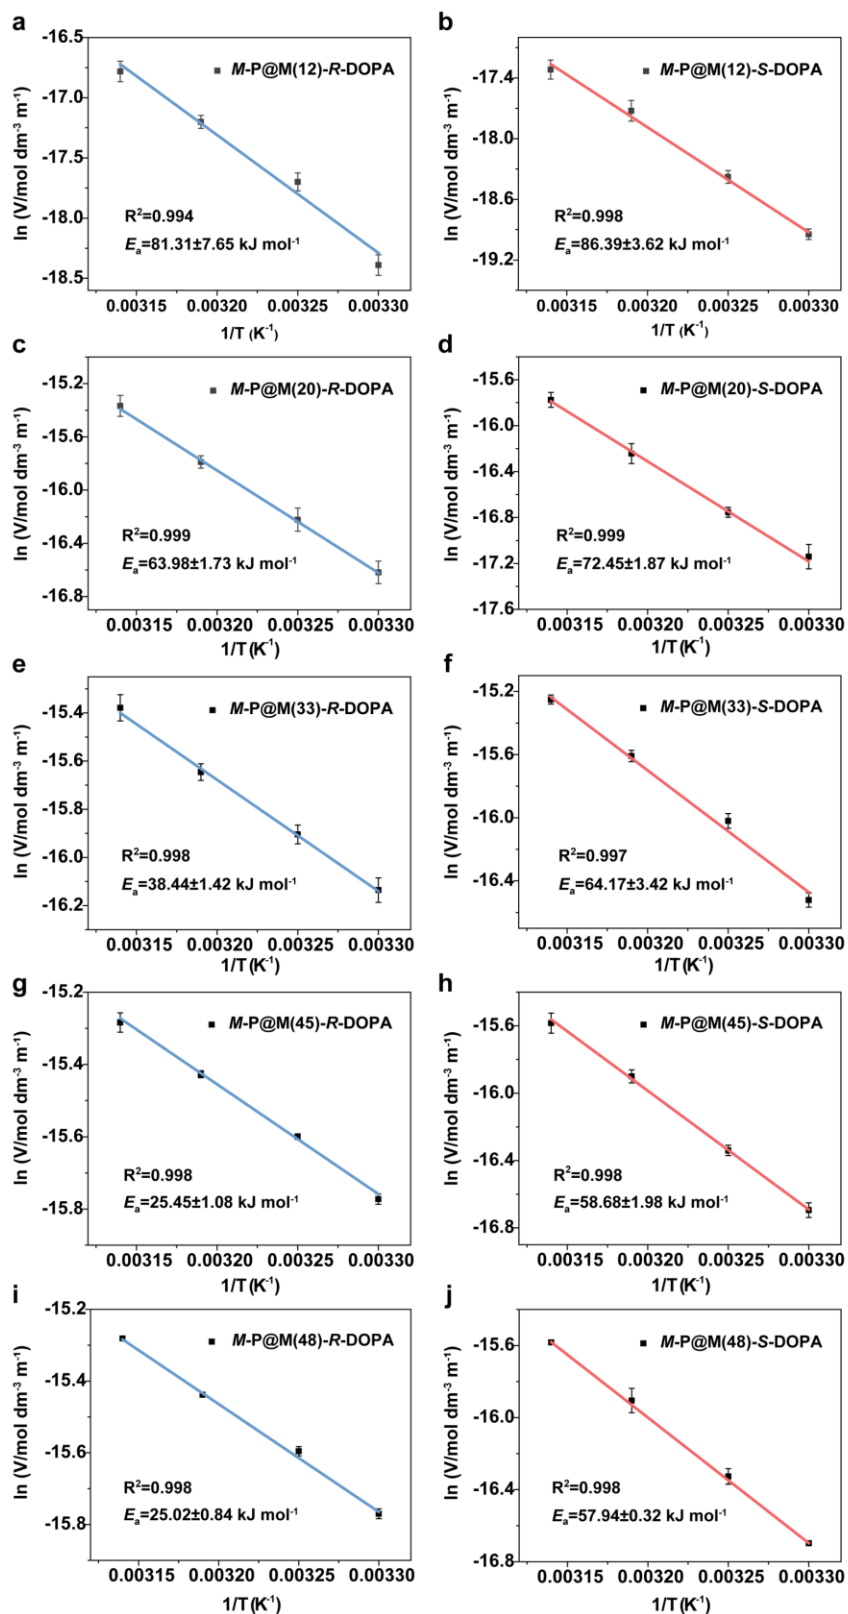

**Fig. S12** Activation energy ( $E_a$ ) lines for a, b)  $M-P@M(12)$ , c, d)  $M-P@M(20)$ , e, f)  $M-P@M(33)$ , g, h)  $M-P@M(45)$  and i, j)  $M-P@M(48)$  for catalyzing  $R/S$ -DOPA.

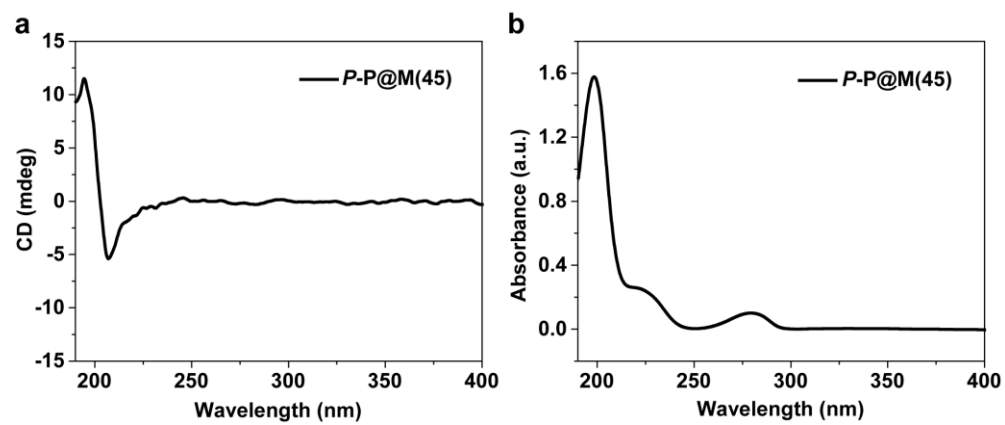

**Fig. S13** a) The CD and b) UV-vis spectra for the 0.05 mM racemic DOPA solution after the *P-P@M(45)* absorption.

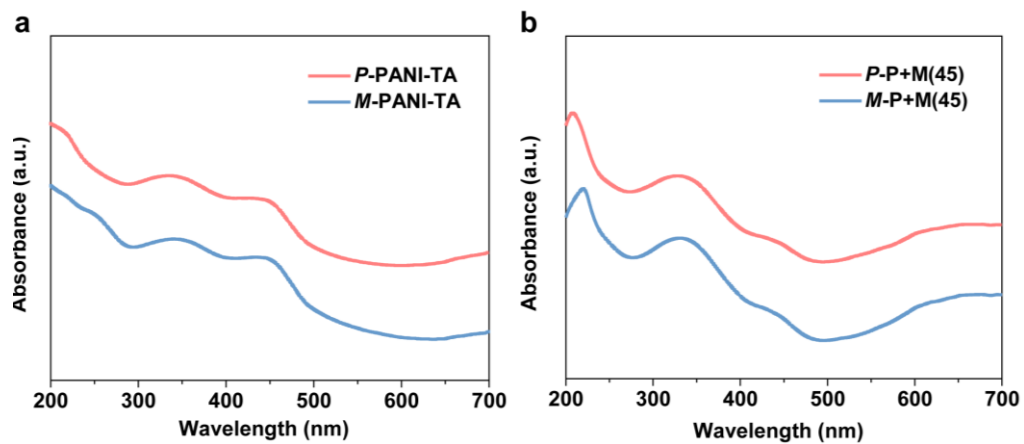

**Fig. S14** The UV-vis spectra for a) *P/M*-PANI-TA and b) *P/M*-P+M(45).

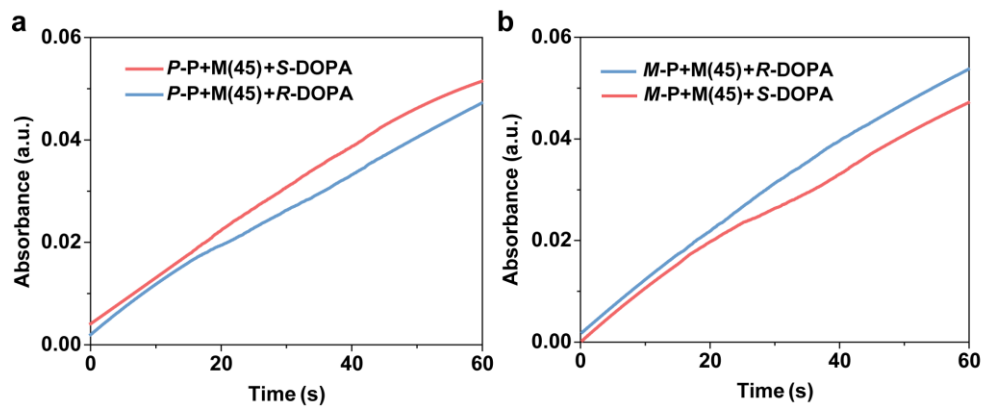

**Fig. S15** Kinetic curves of “Absorption vs. Time” for a)  $P\text{-}P+M(45)$  and b)  $M\text{-}P+M(45)$  obtained with  $S/R\text{-}DOPA$  concentration fixed as 0.05 mM at  $\lambda_{\text{max}} = 475$  nm.

**Table S1** Weight percentage of MnO<sub>2</sub> in different samples calculated by ICP-AES analysis.

| Sample           | Sample concentration<br>(mg·mL <sup>-1</sup> ) | Mn concentration<br>(mg·L <sup>-1</sup> ) | Weight percentage of<br>MnO <sub>2</sub> (%) |
|------------------|------------------------------------------------|-------------------------------------------|----------------------------------------------|
| <i>P-P@M(12)</i> | 0.50                                           | 39.01                                     | 12.33                                        |
| <i>P-P@M(20)</i> | 0.50                                           | 64.05                                     | 20.24                                        |
| <i>P-P@M(33)</i> | 0.50                                           | 104.0                                     | 32.87                                        |
| <i>P-P@M(45)</i> | 0.50                                           | 142.9                                     | 45.15                                        |
| <i>P-P@M(48)</i> | 0.50                                           | 152.5                                     | 48.21                                        |

**Table S2** Kinetic parameters for enzymatic catalysis of *R/S*-DOPA enantiomers by *P-P@M*(12), *P-P@M*(20), *P-P@M*(33), *P-P@M*(45) and *P-P@M*(48).

| Sample            | Substrate      | $K_M$<br>( $10^{-6}$ M) | $k_{cat}$<br>( $10^{-4}$ M $\cdot$ s $^{-1}$ $\cdot$ g $^{-1}$ ) | $k_{cat}/K_M$<br>(s $^{-1}$ $\cdot$ g $^{-1}$ ) | Select factor   |
|-------------------|----------------|-------------------------|------------------------------------------------------------------|-------------------------------------------------|-----------------|
| <i>P-P@M</i> (12) | <i>R</i> -DOPA | 10.06 $\pm$ 0.72        | 6.23 $\pm$ 0.09                                                  | 61.93 $\pm$ 5.35                                | 1.17 $\pm$ 0.29 |
| <i>P-P@M</i> (12) | <i>S</i> -DOPA | 10.04 $\pm$ 1.24        | 7.28 $\pm$ 0.22                                                  | 72.51 $\pm$ 11.32                               |                 |
| <i>P-P@M</i> (20) | <i>R</i> -DOPA | 11.49 $\pm$ 1.61        | 9.41 $\pm$ 0.32                                                  | 81.90 $\pm$ 14.55                               | 1.51 $\pm$ 0.40 |
| <i>P-P@M</i> (20) | <i>S</i> -DOPA | 9.10 $\pm$ 0.58         | 11.29 $\pm$ 0.17                                                 | 124.07 $\pm$ 9.82                               |                 |
| <i>P-P@M</i> (33) | <i>R</i> -DOPA | 13.00 $\pm$ 1.49        | 13.68 $\pm$ 0.45                                                 | 105.23 $\pm$ 15.73                              | 2.21 $\pm$ 0.51 |
| <i>P-P@M</i> (33) | <i>S</i> -DOPA | 7.30 $\pm$ 0.46         | 17.01 $\pm$ 0.22                                                 | 233.01 $\pm$ 17.77                              |                 |
| <i>P-P@M</i> (45) | <i>R</i> -DOPA | 13.80 $\pm$ 0.92        | 14.98 $\pm$ 0.21                                                 | 108.55 $\pm$ 8.80                               | 2.82 $\pm$ 0.41 |
| <i>P-P@M</i> (45) | <i>S</i> -DOPA | 6.28 $\pm$ 0.32         | 19.24 $\pm$ 0.20                                                 | 306.37 $\pm$ 18.84                              |                 |
| <i>P-P@M</i> (48) | <i>R</i> -DOPA | 13.25 $\pm$ 1.09        | 15.51 $\pm$ 0.28                                                 | 117.06 $\pm$ 11.82                              | 2.63 $\pm$ 0.48 |
| <i>P-P@M</i> (48) | <i>S</i> -DOPA | 6.36 $\pm$ 0.41         | 19.61 $\pm$ 0.29                                                 | 308.33 $\pm$ 24.54                              |                 |

**Table S3** Kinetic parameters for enzymatic catalysis of *R/S*-DOPA enantiomers by *M-P@M*(12), *M-P@M*(20), *M-P@M*(33), *M-P@M*(45) and *M-P@M*(48).

| Sample            | Substrate      | $K_M$<br>( $10^{-6}$ M) | $k_{cat}$<br>( $10^{-4}$ M $\cdot$ s $^{-1}$ $\cdot$ g $^{-1}$ ) | $k_{cat}/K_M$<br>(s $^{-1}$ $\cdot$ g $^{-1}$ ) | Select factor   |
|-------------------|----------------|-------------------------|------------------------------------------------------------------|-------------------------------------------------|-----------------|
| <i>M-P@M</i> (12) | <i>R</i> -DOPA | 10.08 $\pm$ 1.51        | 7.36 $\pm$ 0.28                                                  | 73.02 $\pm$ 14.03                               | 1.20 $\pm$ 0.36 |
| <i>M-P@M</i> (12) | <i>S</i> -DOPA | 10.16 $\pm$ 0.87        | 6.18 $\pm$ 0.13                                                  | 60.83 $\pm$ 6.54                                |                 |
| <i>M-P@M</i> (20) | <i>R</i> -DOPA | 9.36 $\pm$ 0.42         | 11.38 $\pm$ 0.12                                                 | 121.58 $\pm$ 6.75                               | 1.46 $\pm$ 0.35 |
| <i>M-P@M</i> (20) | <i>S</i> -DOPA | 11.94 $\pm$ 1.67        | 9.97 $\pm$ 0.32                                                  | 83.50 $\pm$ 14.65                               |                 |
| <i>M-P@M</i> (33) | <i>R</i> -DOPA | 7.56 $\pm$ 0.54         | 17.30 $\pm$ 0.29                                                 | 228.84 $\pm$ 20.28                              | 2.18 $\pm$ 0.50 |
| <i>M-P@M</i> (33) | <i>S</i> -DOPA | 13.14 $\pm$ 1.36        | 13.77 $\pm$ 0.40                                                 | 104.79 $\pm$ 14.04                              |                 |
| <i>M-P@M</i> (45) | <i>R</i> -DOPA | 6.25 $\pm$ 0.21         | 19.34 $\pm$ 0.13                                                 | 309.44 $\pm$ 12.49                              | 2.75 $\pm$ 0.30 |
| <i>M-P@M</i> (45) | <i>S</i> -DOPA | 13.21 $\pm$ 0.72        | 14.85 $\pm$ 0.19                                                 | 112.41 $\pm$ 7.59                               |                 |
| <i>M-P@M</i> (48) | <i>R</i> -DOPA | 6.23 $\pm$ 0.36         | 19.42 $\pm$ 0.23                                                 | 311.72 $\pm$ 21.78                              | 2.58 $\pm$ 0.52 |
| <i>M-P@M</i> (48) | <i>S</i> -DOPA | 12.77 $\pm$ 1.31        | 15.44 $\pm$ 0.39                                                 | 120.91 $\pm$ 15.62                              |                 |

**Table S4** Comparison of the chiral nanozymes for enantioselective catalysis of *R/S*-DOPA measured in our work with those reported in previous literatures.

| Nanozyme                          | Activity   | Select factor | Reference                                            |
|-----------------------------------|------------|---------------|------------------------------------------------------|
| D-C-Dots                          | OXD        | 2.11          | <i>Nano Lett.</i> <b>2022</b> , 22, 7203             |
| L-C-Dots                          | OXD        | 1.95          |                                                      |
| D-Cys@AuNPs-EMSN                  | POD        | 1.47          | <i>Angew. Chem. Int. Ed.</i> <b>2018</b> , 57, 16791 |
| L-Cys@AuNPs-EMSN                  | POD        | 1.69          |                                                      |
| CeNP@D-Phe                        | OXD        | 1.13          | <i>Chem.Eur. J.</i> <b>2017</b> , 23, 18146          |
| CeNP@L-Phe                        | OXD        | 1.87          |                                                      |
| D-FexCuySe NPs                    | POD        | 1.49          | <i>Nanotechnology</i> <b>2022</b> , 33, 135503       |
| L-FexCuySe NPs                    | POD        | 1.56          |                                                      |
| D-His@Fe-COF                      | POD        | 1.51          | <i>Mater. Horiz.</i> <b>2020</b> , 7, 3291           |
| L-His@Fe-COF                      | POD        | 1.86          |                                                      |
| MOF-D-His-Cu                      | COs        | 2.12          | <i>Nano Lett.</i> <b>2023</b> , 23, 701              |
| MOF-D-His-Cu                      | COs        | 2.19          |                                                      |
| DCDH@CuNPs                        | POD        | 1.85          | <i>ACS. Appl. Bio. Mater.</i> <b>2023</b> , 6, 1676  |
| AuNP@LIPIA 1                      | POD        | 1.90          | <i>Nanoscale</i> <b>2020</b> , 12, 2422              |
| ( <i>P</i> )-L-PhgC16-NR-M(ii)    | POD        | 2.80          | <i>Chem. Commun.</i> <b>2024</b> , 60, 4569          |
| ( <i>M</i> )-L-PhgC16-NR-M(ii)    | POD        | 2.35          |                                                      |
| <i>P</i> -PANI-TA-M <sup>2+</sup> | POD        | 2.07          | <i>Small</i> <b>2023</b> , 19, 2303739               |
| <i>M</i> -PANI-TA-M <sup>2+</sup> | POD        | 1.70          |                                                      |
| <b><i>P-P@M(45)</i></b>           | <b>POD</b> | <b>2.82</b>   | <b>This work</b>                                     |
| <b><i>M-P@M(45)</i></b>           | <b>POD</b> | <b>2.75</b>   |                                                      |



**Table S5** Kinetic parameters for enzymatic catalysis of *R/S*-DOPA enantiomers by *P/M*-P+M(45).

| Sample            | Substrate      | $K_M$<br>( $10^{-6}$ M) | $k_{cat}$<br>( $10^{-4}$ M $\cdot$ s $^{-1}$ $\cdot$ g $^{-1}$ ) | $k_{cat}/K_M$<br>(s $^{-1}$ $\cdot$ g $^{-1}$ ) | Select factor   |
|-------------------|----------------|-------------------------|------------------------------------------------------------------|-------------------------------------------------|-----------------|
| <i>P</i> -P+M(45) | <i>R</i> -DOPA | 25.51 $\pm$ 3.28        | 20.62 $\pm$ 0.90                                                 | 80.83 $\pm$ 14.16                               | 1.28 $\pm$ 0.39 |
| <i>P</i> -P+M(45) | <i>S</i> -DOPA | 20.32 $\pm$ 1.93        | 21.07 $\pm$ 0.54                                                 | 103.69 $\pm$ 12.62                              |                 |
| <i>M</i> -P+M(45) | <i>R</i> -DOPA | 19.89 $\pm$ 1.80        | 21.10 $\pm$ 0.51                                                 | 106.08 $\pm$ 12.26                              | 1.30 $\pm$ 0.37 |
| <i>M</i> -P+M(45) | <i>S</i> -DOPA | 25.22 $\pm$ 3.14        | 20.52 $\pm$ 0.72                                                 | 81.36 $\pm$ 13.19                               |                 |
